# Supplementary material for: Phospholamban inhibits the cardiac calcium pump by interrupting an allosteric activation pathway
Source: PubMed Central journal article supplement (PMC11098958; doi:10.1016/j.jbc.2024.107267), 2024-04-06

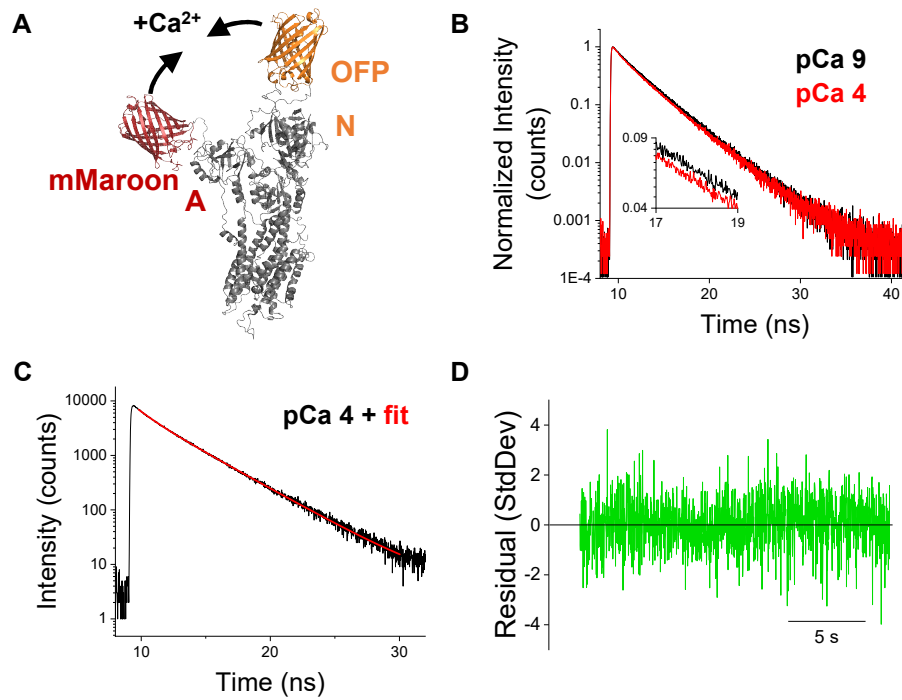

**Supplementary Figure S1.** **A)** 2-color SERCA biosensor labeled on the A and N domains undergoes headpiece closure during  $Ca^{2+}$  binding by intramolecular FRET. **B)** The fluorescence lifetime of the OFF donor in 2-color SERCA is quenched by the mMaroon acceptor when  $Ca^{2+}$  is increased from pCa 9 to pCa 4, due closure of the labeled headpieces (as in panel A). The inset data are zoomed in two make the difference more appreciable. **D)** A representative fit (*red*) of the OFF donor lifetime (*black*) using a two exponential decay function. **E)** A residual of a two-exponential decay fit of the OFF donor lifetime of 2-color SERCA shows that the data are well described by this two species model.

**Apparent  $K_{Ca}$  in the Absence of Nucleotide  
(Mean  $\pm$  SEM)**

| Condition   | $K_{Ca}$ ( $\mu$ M) |
|-------------|---------------------|
| SERCA alone | 1.77 $\pm$ 0.11     |
| PLB         | 1.68 $\pm$ 0.16     |
| S16E        | 1.84 $\pm$ 0.20     |

**Supplementary Table S1.** Apparent  $Ca^{2+}$  binding constants derived from intramolecular FRET measurements of 2-color SERCA alone and with WT- or S16E-PLB in the absence of nucleotide.

**Apparent  $K_{Ca}$  in the Absence of Nucleotide  
 $p$  values from 1-way ANOVA with Tukey's post-hoc**

|      | SERCA alone | PLB   |
|------|-------------|-------|
| S16E | 0.959       | 0.762 |
| PLB  | 0.903       |       |

**Supplementary Table S2.**  $P$  values comparing differences in apparent  $Ca^{2+}$  binding constants of SERCA alone and with WT- or S16E-PLB in the absence of nucleotide. These values were determined by one-way ANOVA with Tukey's *post-hoc* test (\* =  $p < 0.05$ ).

| Apparent $K_{Ca}$ +Nucleotide<br>(Mean $\pm$ SEM) |                     |
|---------------------------------------------------|---------------------|
| Condition                                         | $K_{Ca}$ ( $\mu$ M) |
| SERCA alone                                       | 0.33 $\pm$ 0.03     |
| PLB                                               | 0.78 $\pm$ 0.14     |
| S16E                                              | 0.34 $\pm$ 0.04     |

**Supplementary Table S3.** Apparent  $Ca^{2+}$  binding constants derived from intramolecular FRET measurements of 2-color SERCA alone and with WT- or S16E-PLB in the presence of AMPPCP.

| Apparent $K_{Ca}$ +Nucleotide<br><i>p</i> values from 1-way ANOVA with Tukey's post-hoc |                                |               |
|-----------------------------------------------------------------------------------------|--------------------------------|---------------|
|                                                                                         | SERCA alone                    | PLB           |
| S16E                                                                                    | 0.999                          | <b>0.001*</b> |
| PLB                                                                                     | <b>9.78 x 10<sup>-4</sup>*</b> |               |

**Supplementary Table S4.** *P* values comparing differences in apparent  $Ca^{2+}$  binding constants of SERCA alone and with WT- or S16E-PLB in the presence of AMPPCP. These values were determined by one-way ANOVA with Tukey's *post-hoc* test (\* =  $p < 0.05$ ).

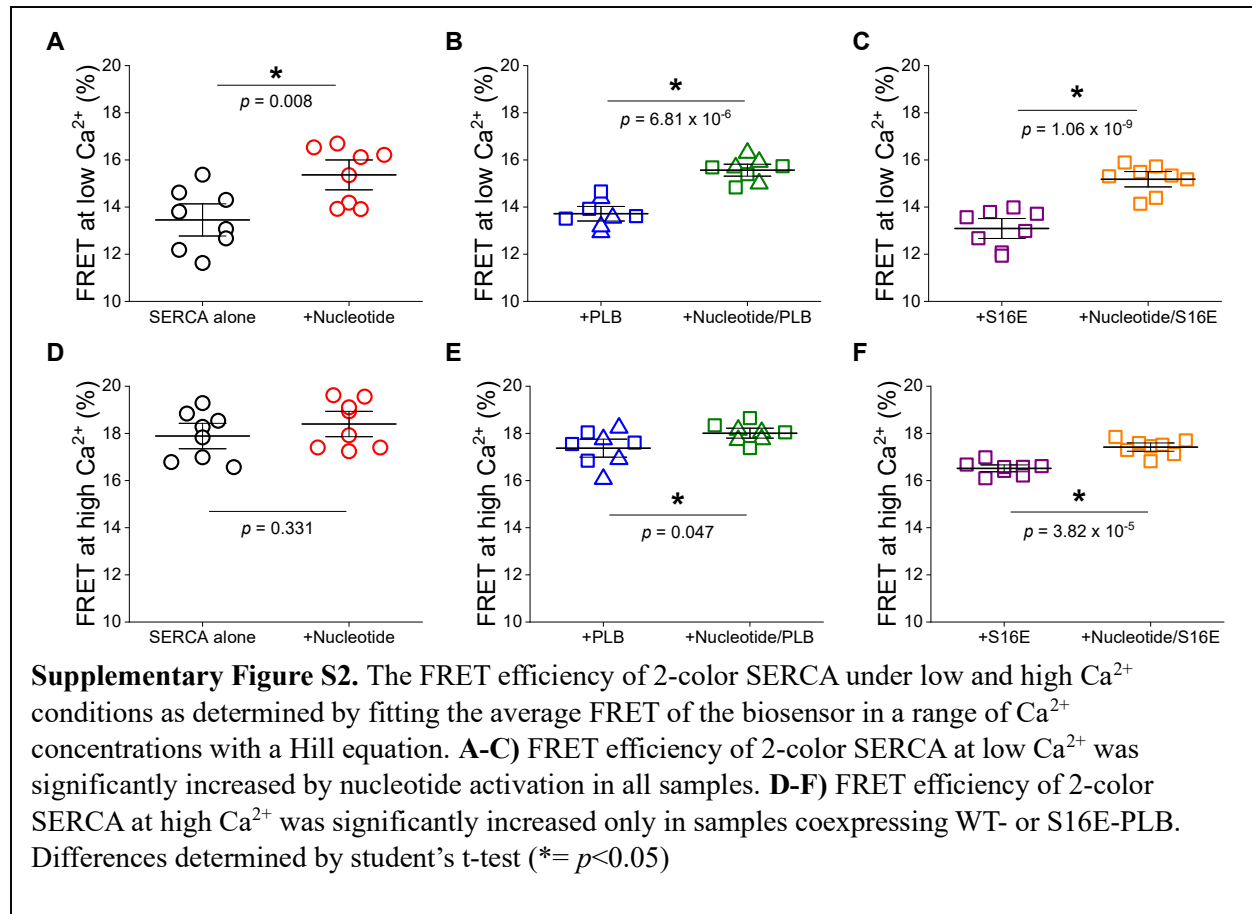

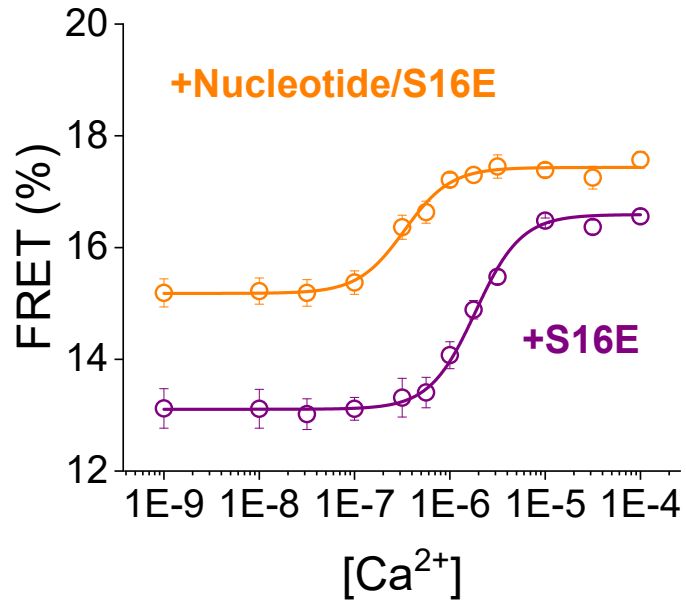

**Supplementary Figure S3.** 2-color SERCA FRET changes during Ca<sup>2+</sup> binding measured in samples coexpressing SERCA and S16E-PLB (1:5 SERCA to PLB ratio) in the presence (*orange*) and absence of AMPPCP (*purple*).

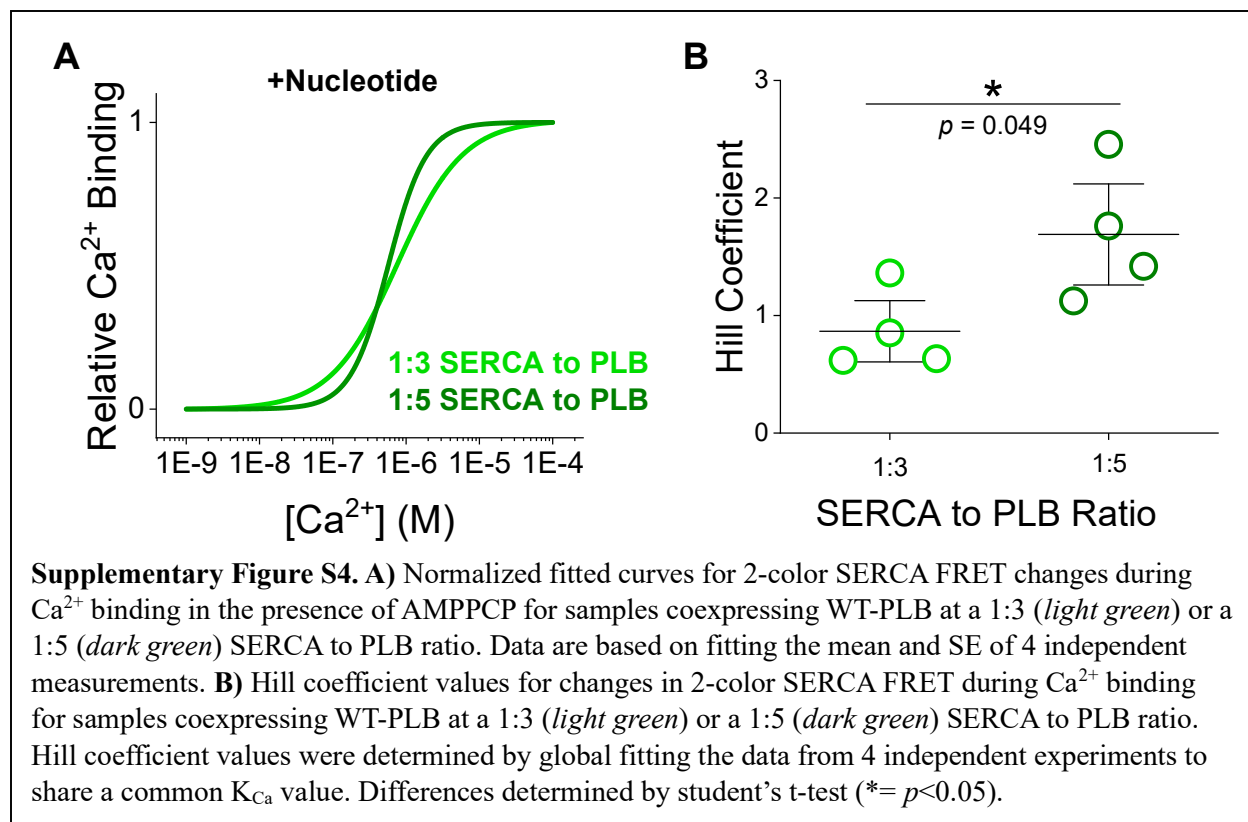

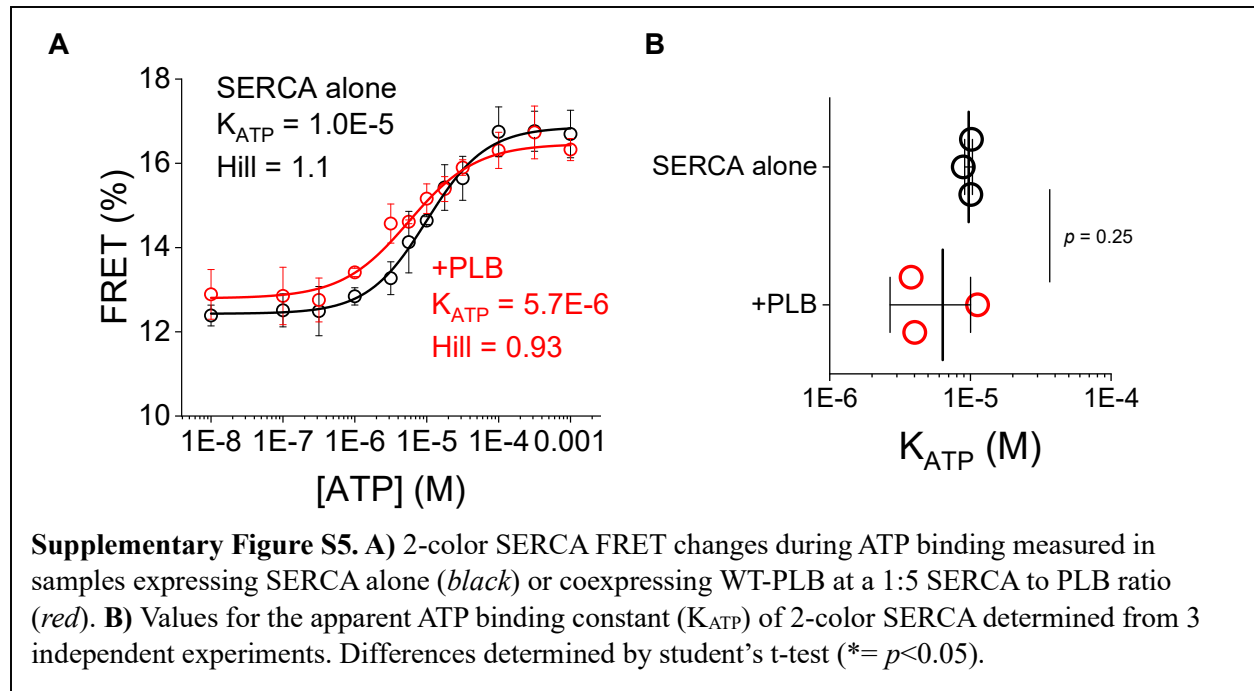

**Supplementary Figure S5. A)** 2-color SERCA FRET changes during ATP binding measured in samples expressing SERCA alone (*black*) or coexpressing WT-PLB at a 1:5 SERCA to PLB ratio (*red*). **B)** Values for the apparent ATP binding constant ( $K_{ATP}$ ) of 2-color SERCA determined from 3 independent experiments. Differences determined by student's t-test ( $* = p < 0.05$ ).

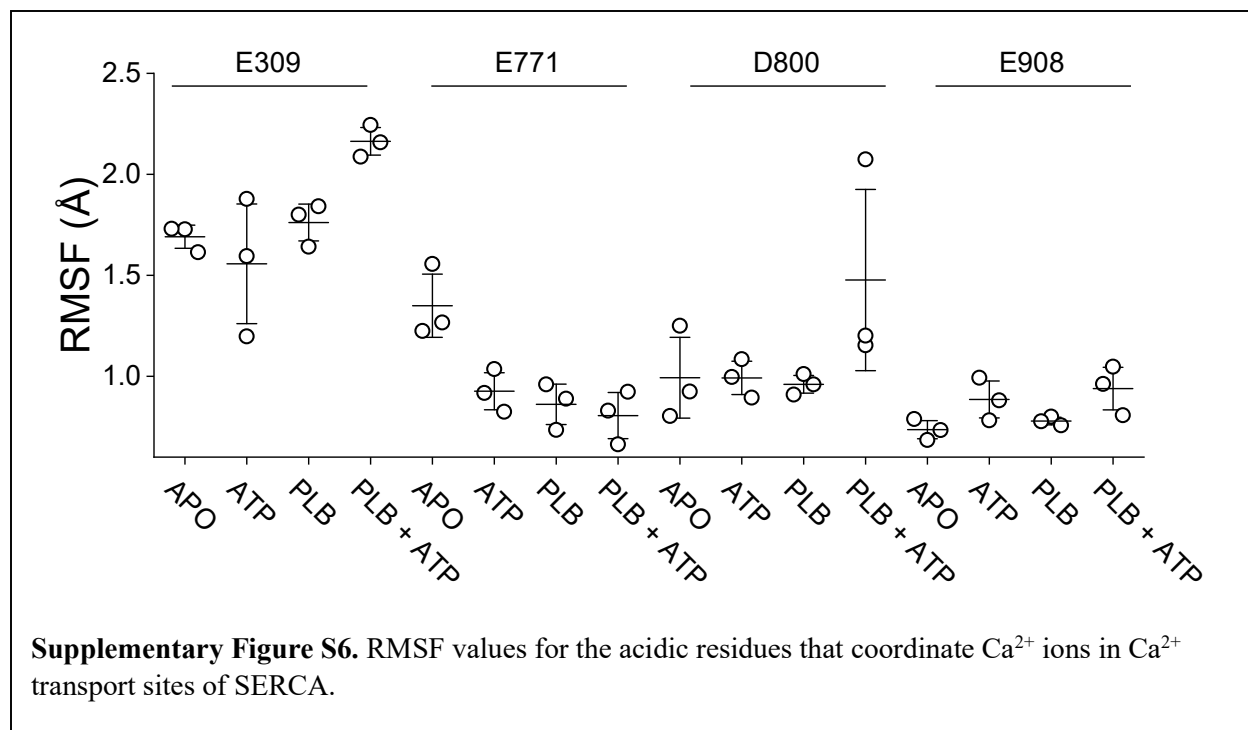

**Supplementary Figure S6.** RMSF values for the acidic residues that coordinate  $\text{Ca}^{2+}$  ions in  $\text{Ca}^{2+}$  transport sites of SERCA.



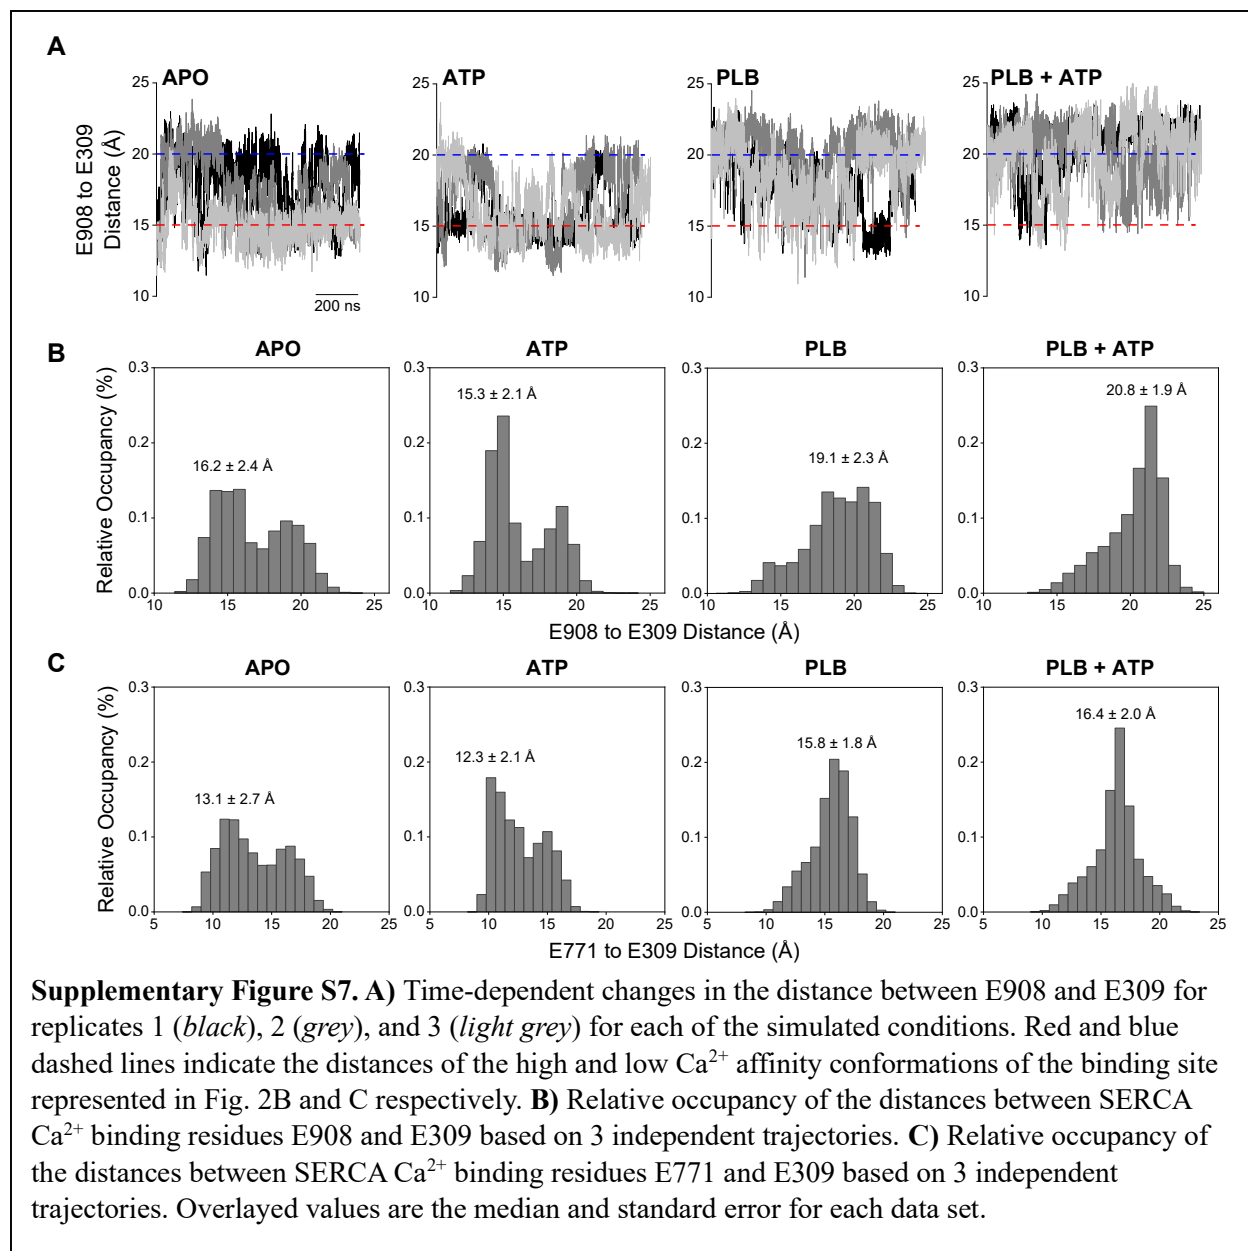

Supplement: mmc1.pdf [file mmc1.pdf]
